# Supplementary material
Source: MDPI journal article supplement (https://www.mdpi.com/2073-4441/13/21/3002)
Supplement: s1 [file s1]

Supporting information for:

## **Data-driven system dynamics model for simulating water quantity and quality in peri-urban streams**

**Gregory G. Lemaire<sup>1\*</sup>, Shane A. Carnohan<sup>1</sup>, Stanislav Grand<sup>1</sup>, Victor Mazel<sup>1</sup>, Poul L. Bjerg<sup>1</sup>, Ursula S. McKnight<sup>2</sup>**

<sup>1</sup> Department of Environmental Engineering, Technical University of Denmark, Bygningstorvet 115, 2800 Kgs. Lyngby, Denmark

<sup>2</sup> Swedish Meteorological and Hydrological Institute, Folkborgsvägen 17, SE-601 76 Norrköping, Sweden

\* Correspondence: grle@env.dtu.dk

### **Supplementary figures**

Figure S1 shows an example of developed System Dynamic module within the STELLA software environment.

Figure S2 to S4 shows the type and extent of sewer network (S2), location of separated sewer outlets, CSOs outlets and water abstraction wells (S3), and the impervious data (S4) in the investigated catchment.

Figure S5 shows the Manning's number vs. stream water flow scatterplot in the investigated catchment.

Figure S6 displays the regression model air-water temperature used for the natural flow and separated sewer system temperature component.

Figure S7 displays the water flow simulation results, all reaches.

Figure S8 displays the stream depth simulation results, all reaches.

Figure S9 shows the Combined Sewer Overflow (CSOs) results.

Figure S10: displays the water flow simulation results, Donse tributary.

Figure S11 displays the Simulation results for DO daily average concentration expressed in % DO sat (Parallelvej station, see Fig.1)

Figure S12 displays the nitrate concentration results (deterministic solution for reaches Ådalsvej and Nivemølle, see Fig. 1)

Figure S13 displays the ammonium concentration results (deterministic solution for reaches Ådalsvej and Nivemølle, see Fig. 1)

Figure S14 displays the orthophosphate concentration results (deterministic solution for reaches Ådalsvej and Nivemølle, see Fig. 1)

Figure S15 displays the suspended Chlorophyll A concentration results, (deterministic solution for reaches Ådalsvej and Nivemølle, see Fig. 1).

Figure S16 displays the forcing data (nutrients and Chla) used as input for the simulation shown in S12-S15 and Fig. 7.

Figure S17 shows the results of the Rainfall-Runoff model sensitivity testing (Nivemølle).

Figure S18 shows the results of sensitivity test for the DO concentration simulation (Parallelvej).

**Supplementary tables:**

Table S1 provides a summary of available input and monitoring data for the simulated peri-urban catchment

Table S2 provides an overview of all input data, type, frequency range and data source

Table S3 gives the quantitative values for the Model performance rating for Nash-Sutcliffe Efficiency (NSE), Percent BIAS (PBIAS) and RMSE-observations standard deviation ratio (*RSR*).

Table S4 shows all model parameters and references.

Table S5 and S6 shows the input data distribution for the MC simulations carried out for the dissolved oxygen concentration and physico-chemical parameters respectively.

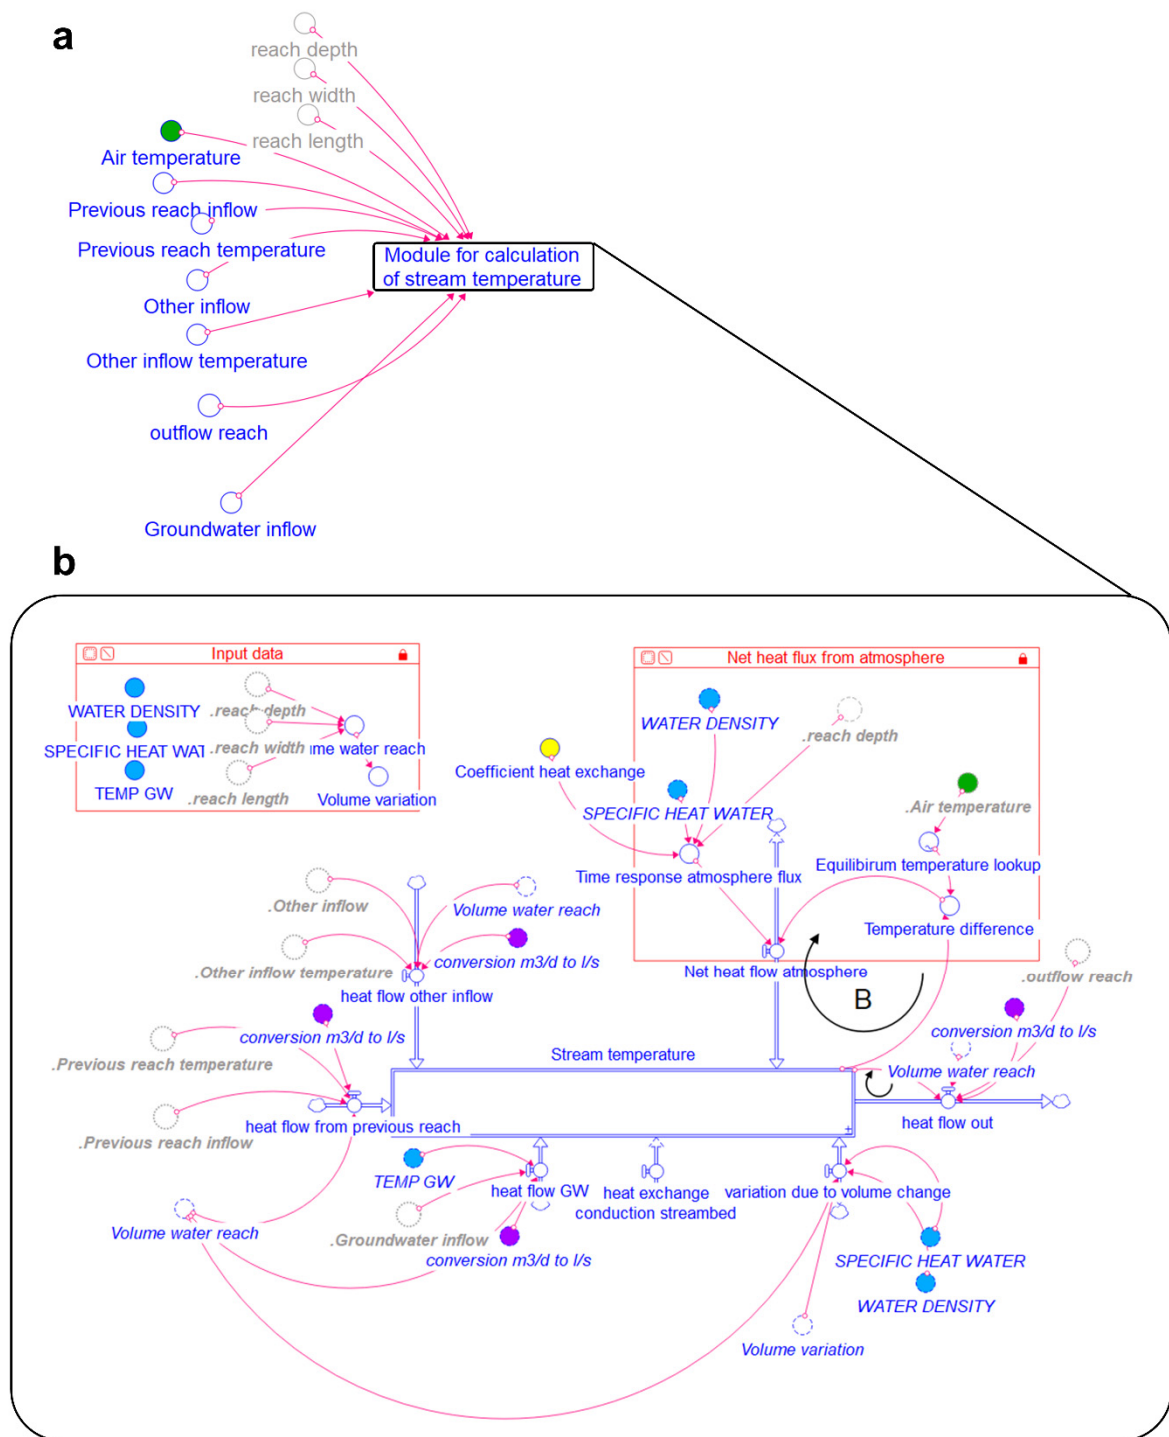

SI Figure S1. Example for an SD module developed for simulating stream temperature. The module is comprised of a) the parameters used for linkage to other components and/or modules within of the overall system; and the actual module, showing b) the detailed structure. The black arrow (loop B) demonstrates a balancing feedback loop for the heat exchange at the interface stream/atmosphere regulating water temperature to an equilibrium with air temperature.

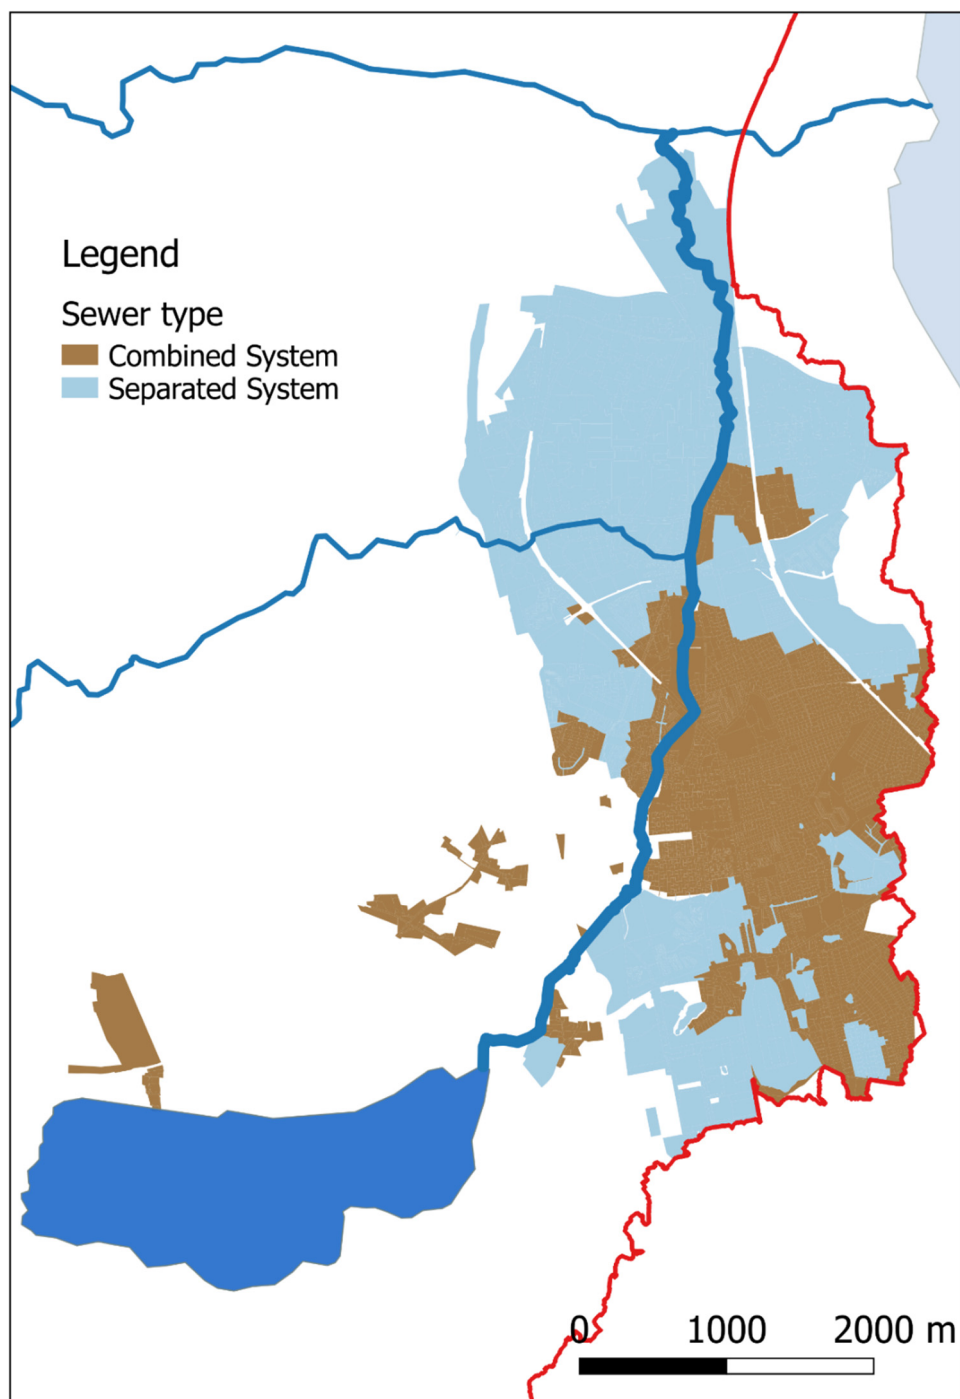

SI Figure S2. Sewer network extent and type for the Usserød catchment (NOVAFOS, 2020).

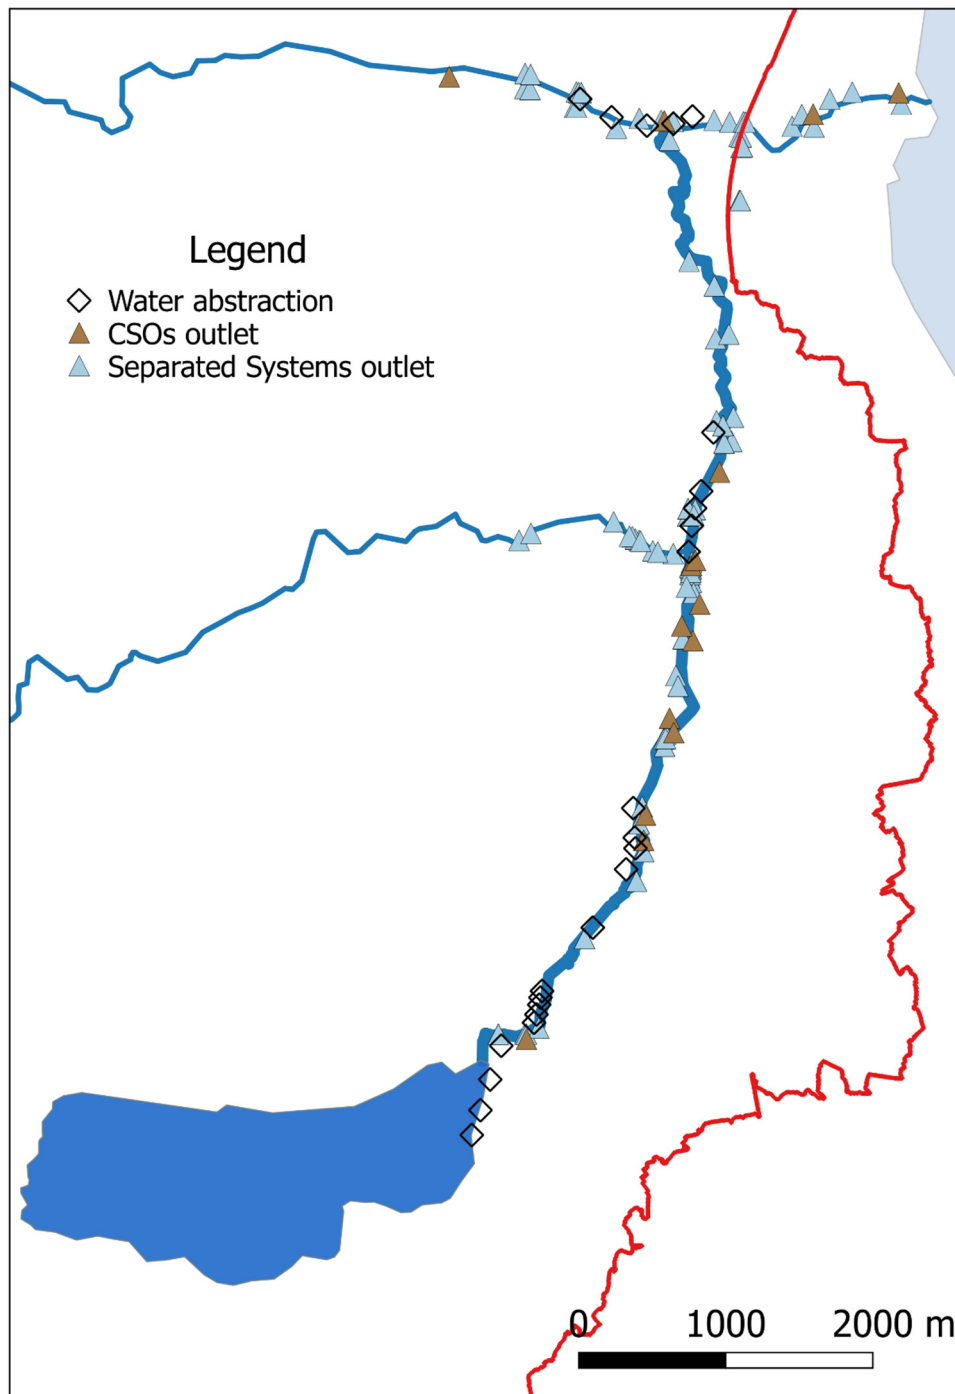

SI Figure S3. Locations for documented water abstraction, separate systems outlets and combined sewer overflows for the Usserød catchment (Danmark Miljøportal, 2020.; NOVAFOS, 2020)

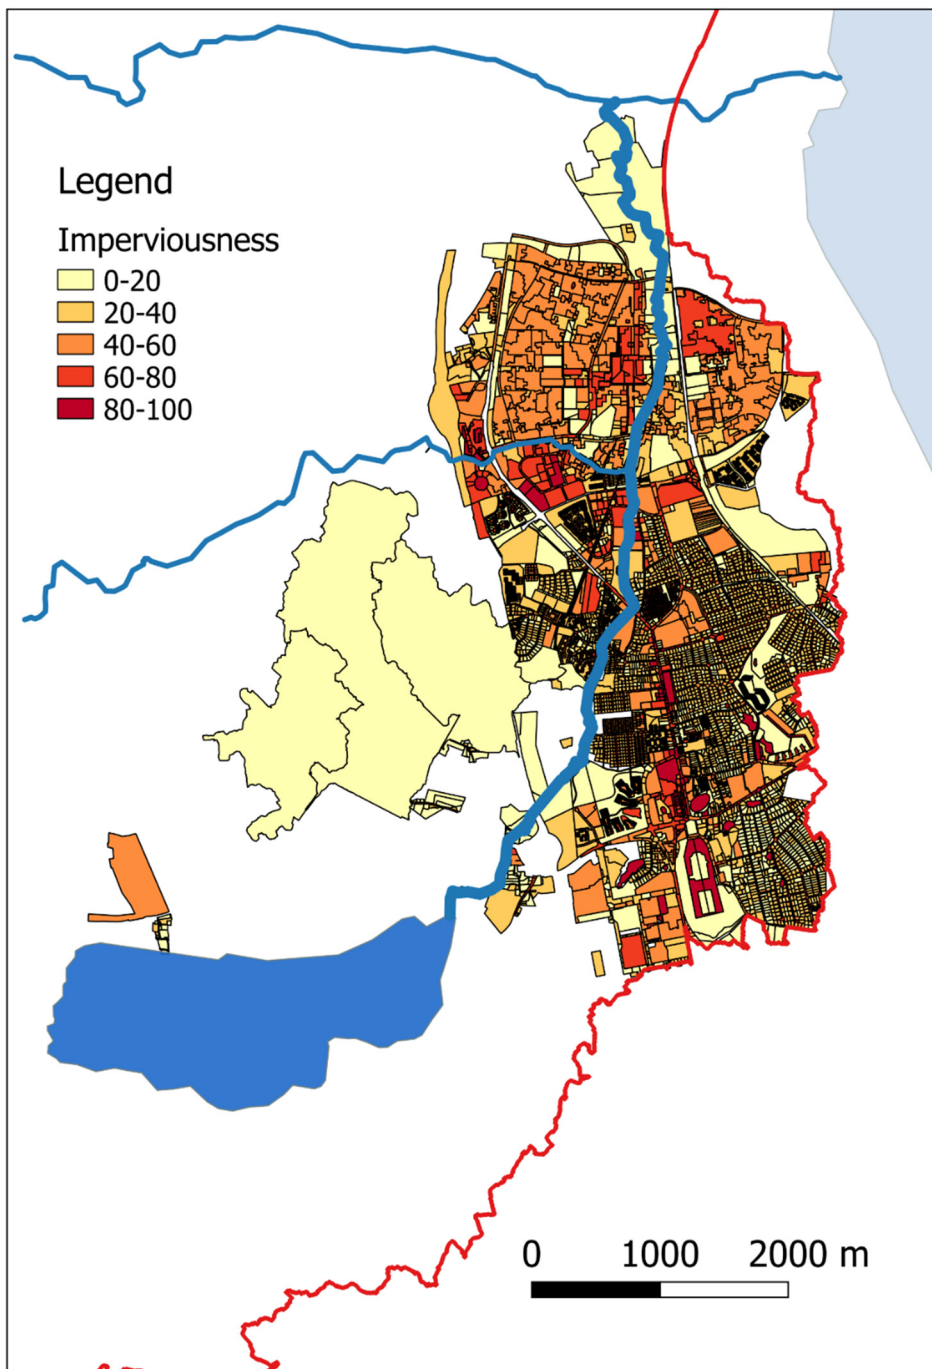

SI Figure S4. Imperviousness distribution data for the Usserød catchment (NOVAFOS, 2020).

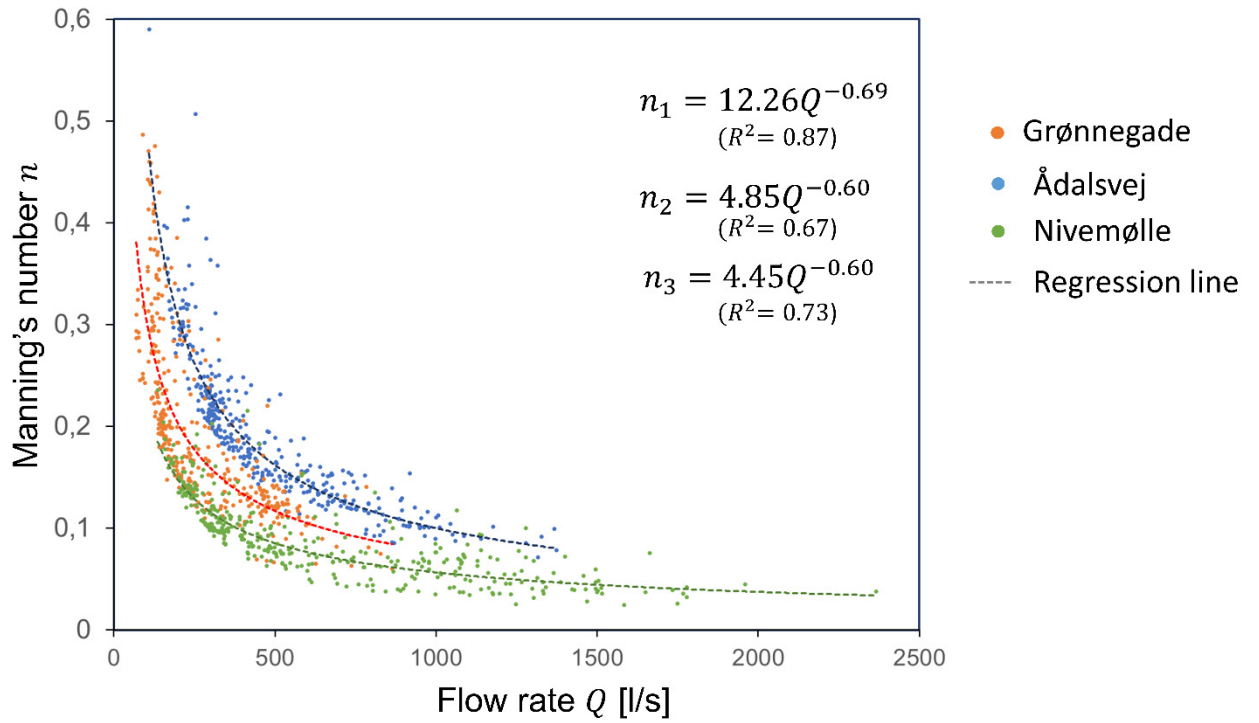

SI Figure S1. Scatterplot for the estimated Manning's number vs. flow rate measured at the outlet of the three modelled reaches in the catchment (Grønnegade: orange; Ådalsvej: blue; Nivemølle: green). Results shown only for calibration year 2017. The Manning's number is estimated using the water depth measurement and assuming a simplified rectangular cross-section profile and low depth. See Appendix A for details.

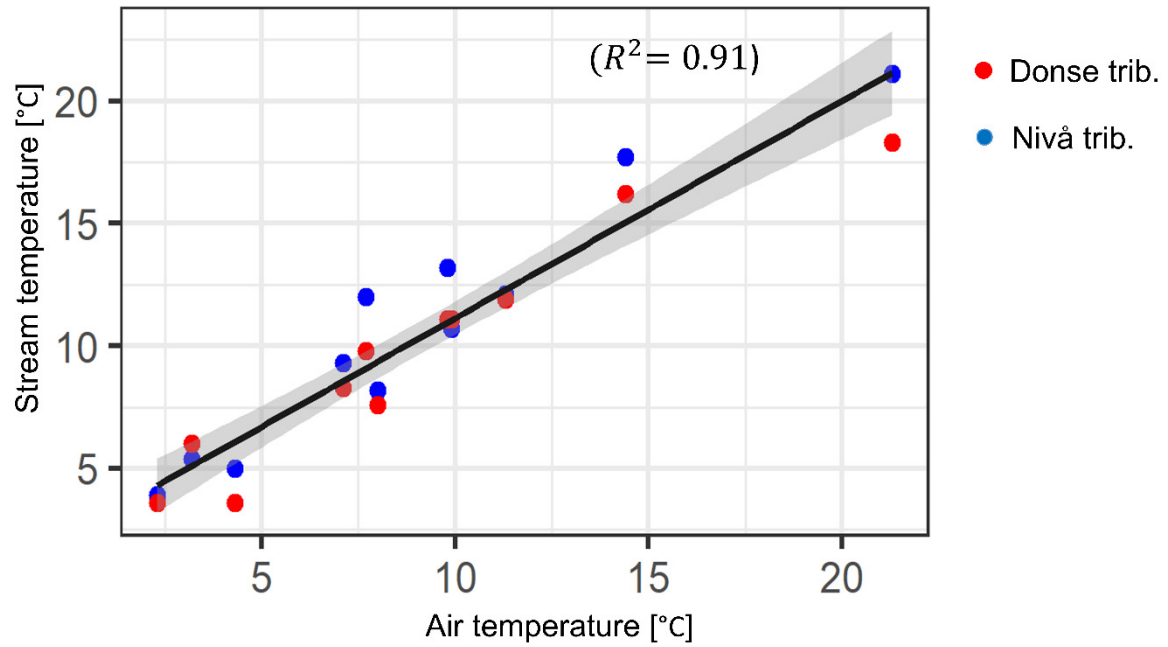

SI Figure S6. Linear regression model for the water temperature estimation of the natural water and urban system components. Data from Lemaire (2021) measured in Donse and Nivå tributaries dominated by non-urban inflows (i.e. no WWTP effluents). The grey shaded area corresponds to the 95% CI for the regression model.



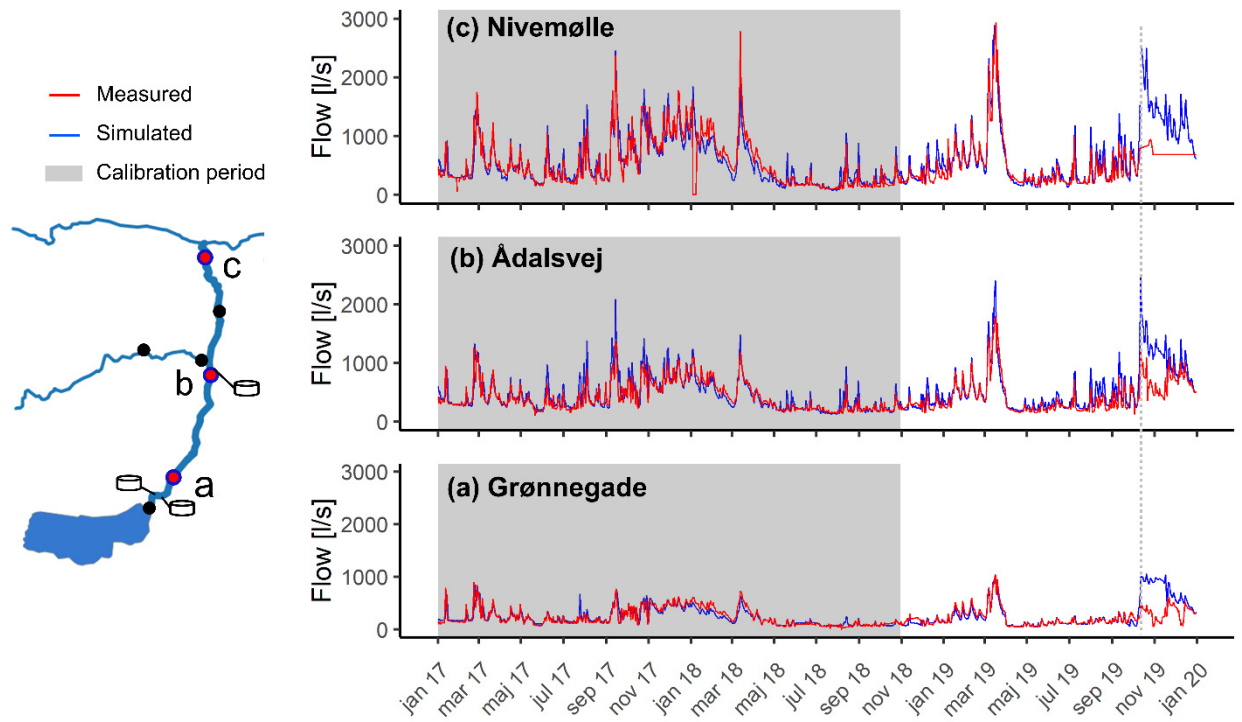

Figure S7. Flow simulation results (blue line) compared to continuous monitoring station measurements (red line) for all three Usserød stream reach outlets: Grønnegade (a), Ådalsvej (b) and Nivemølle (c) (compare Fig. 2). The grey ribbon shows the calibration period; the grey dashed line marks an event of flooding of the stream channel banks in Grønnegade reach.

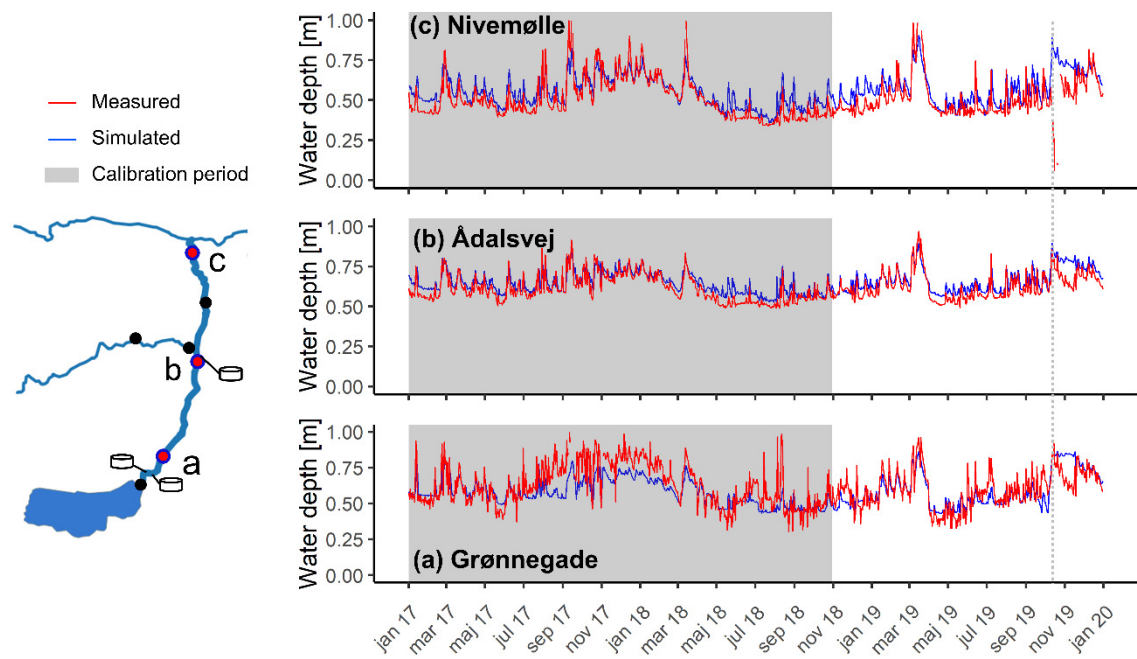

Figure S8. Water depth simulation results (blue line) compared to continuous monitoring station measurements (red line) for all three Usseerød stream reach outlets: Grønnegade (a), Ådalsvej (b) and Nivemølle (c). The grey ribbon shows the calibration period; the grey dashed line marks a flooding of the stream channel banks in Grønnegade reach.

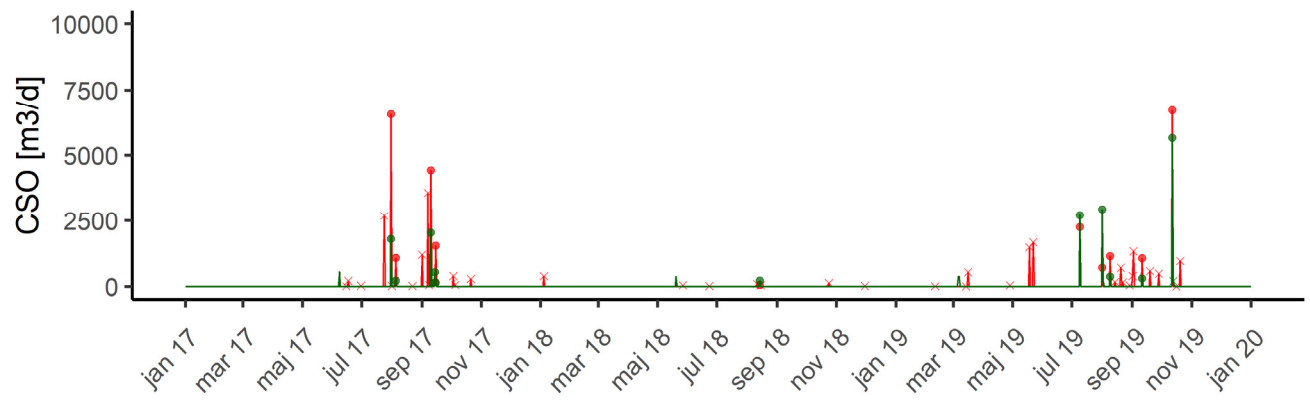

Figure S9. Combined Sewer Overflow events in Ådalsvej reach. Simulated events (green) are compared to measured events (red). Round markers pinpoint an event well captured, while cross markers indicate an event not captured on a daily basis. Total number of events captured by the model based on a simple assumption (basin with non linear flow): 11/49.

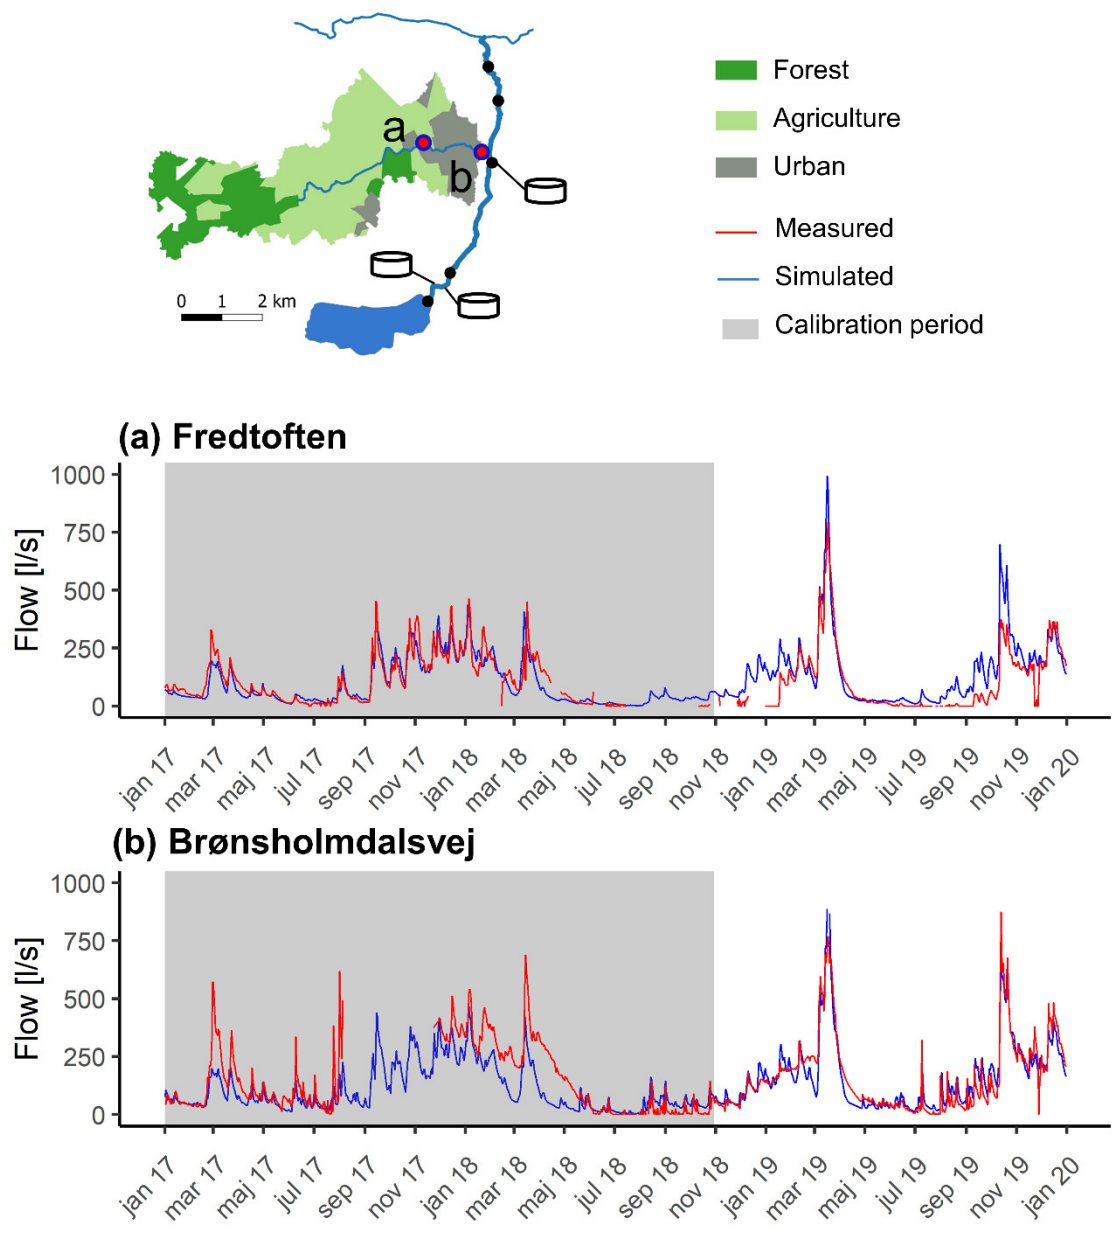

Figure S10. Flow simulation results (blue line) compared to continuous monitoring station measurements (red line) at two points, Fredtoften and Brønsholmdalsvej, in the Donse Tributary.

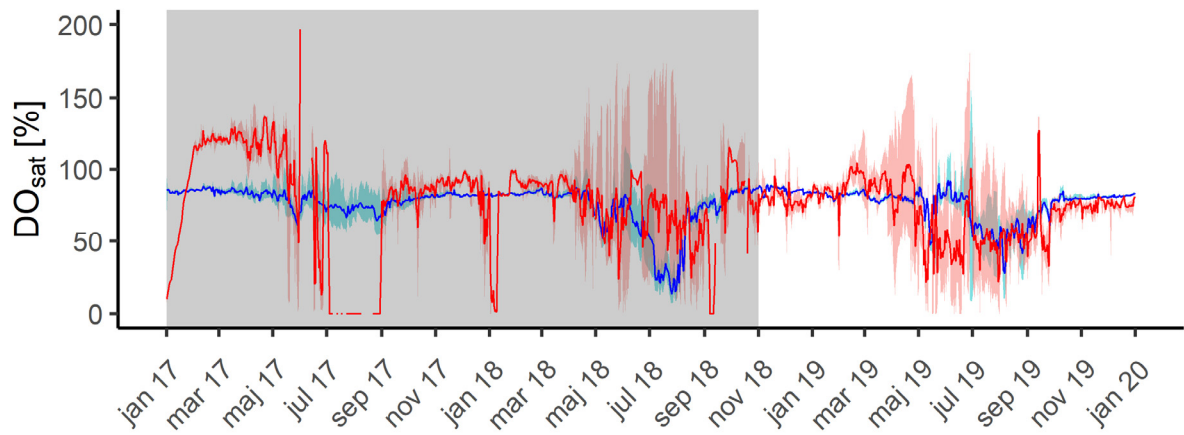

Figure S11. Simulation result for DO daily average concentration (blue line) compared to the online sensor data (red line) at Parrallelvej monitoring station (Fig. 2), expressed in %DO saturation. The grey ribbon indicates the calibration period. The pale blue and red shadings correspond to the amplitude of simulated and measured daily extremes respectively.

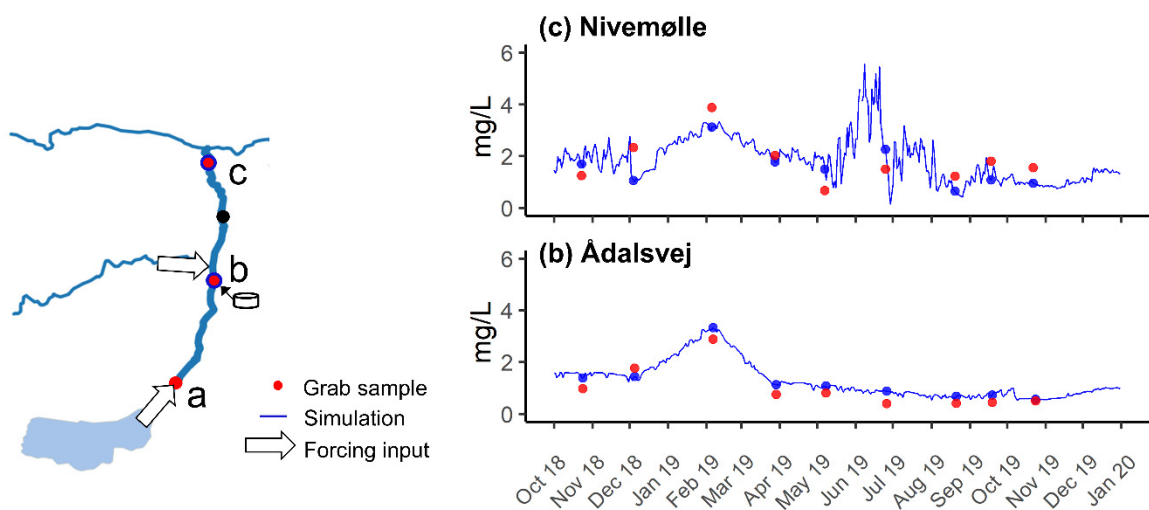

Figure S12. Simulation results (blue line) for NO<sub>3</sub>-N concentration in Ådalsvej and Nivemølle reach, compared to grab sample measurements (red circles). The corresponding daily simulation result is marked by a blue circle to facilitate the comparison. Grab sample concentrations at Grønnegade (a) and at the outlet of the tributary are combined with the estimated flow data as a forcing input (see SI Fig. S16).

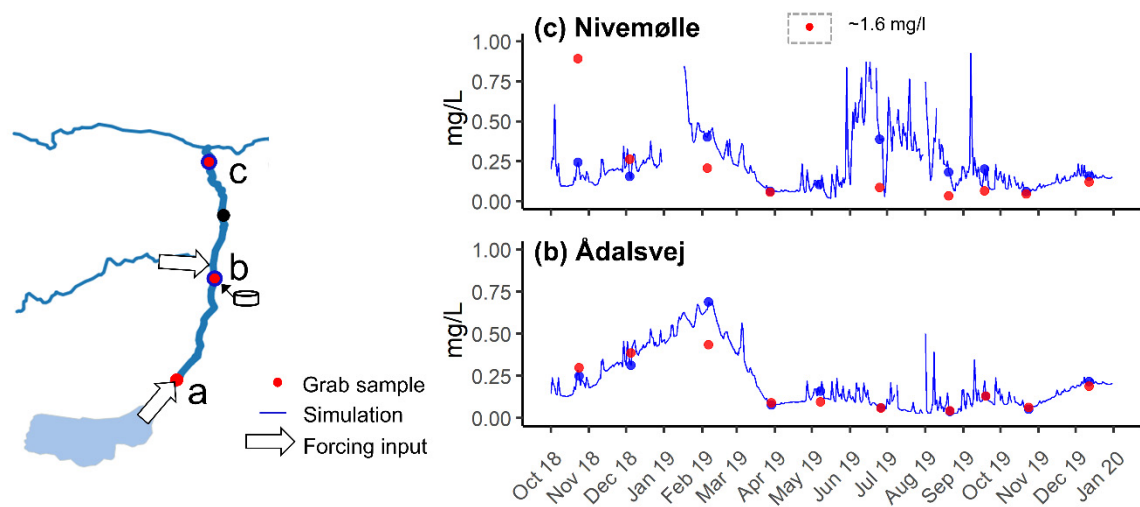

Figure S13. Simulation results (blue line) for  $\text{NH}_4\text{-N}$  concentration in Ådalsvej and Nivemølle reach, compared to grab sample measurements (red circles). The corresponding daily simulation result is marked by a blue circle to facilitate the comparison. Grab sample concentrations at Grønnegade (a) and at the outlet of the tributary are combined with the estimated flow data as a forcing input (see SI Fig. S16).

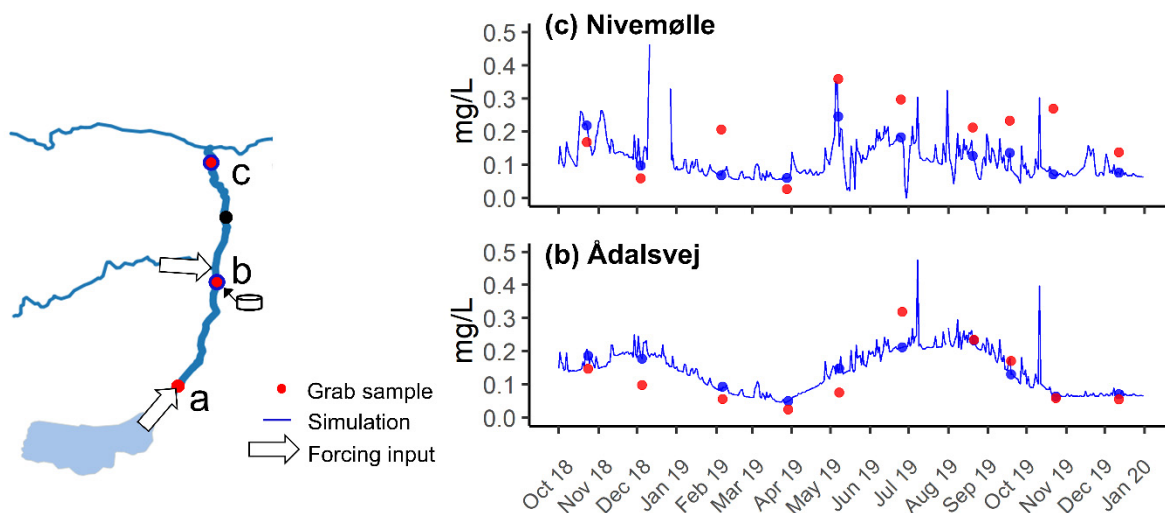

Figure S14. Simulation results (blue line) for PO<sub>4</sub>-P concentration in Ådalsvej and Nivemølle reach, compared to grab sample measurements (red circles). The corresponding daily simulation result is marked by a blue circle to facilitate the comparison. Grab sample concentrations at Grønnegade (a) and at the outlet of the tributary are combined with the estimated flow data as a forcing input (see SI Fig. S16).



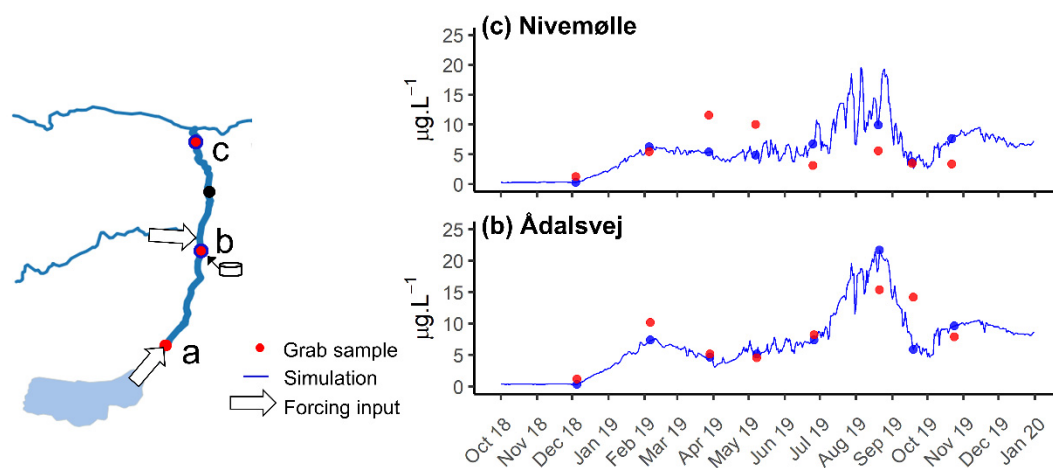

Figure S15. Simulation results (blue line) for suspended chl-a concentration in Ådalsvej and Nivemølle reach, compared to grab sample measurements (red circles). Grab sample concentrations at Grønnegade (a) and at the outlet of the tributary are combined with the estimated flow data as a forcing input (see SI Fig. S16).

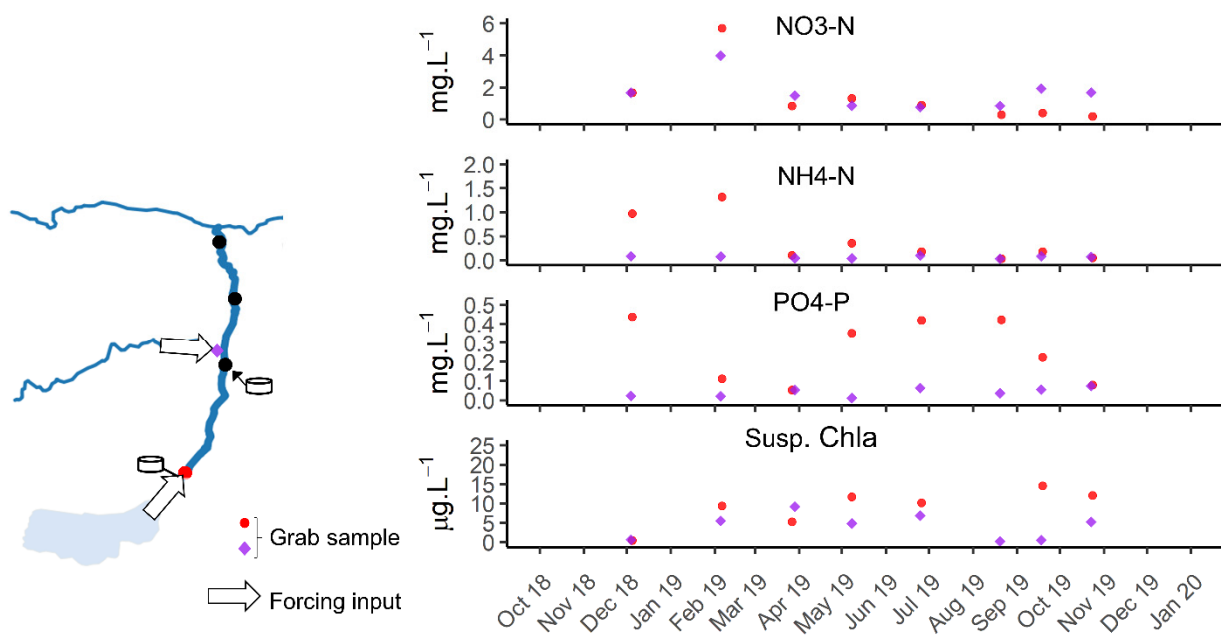

Figure S16. Forcing input concentrations at Grønnegade (red circle) and at the outlet of the tributary (purple diamond) for NO3-N; NH4-N; PO4-P and susp. Chl-a used for the simulations presented in Fig. S12-15 and Fig. 7.

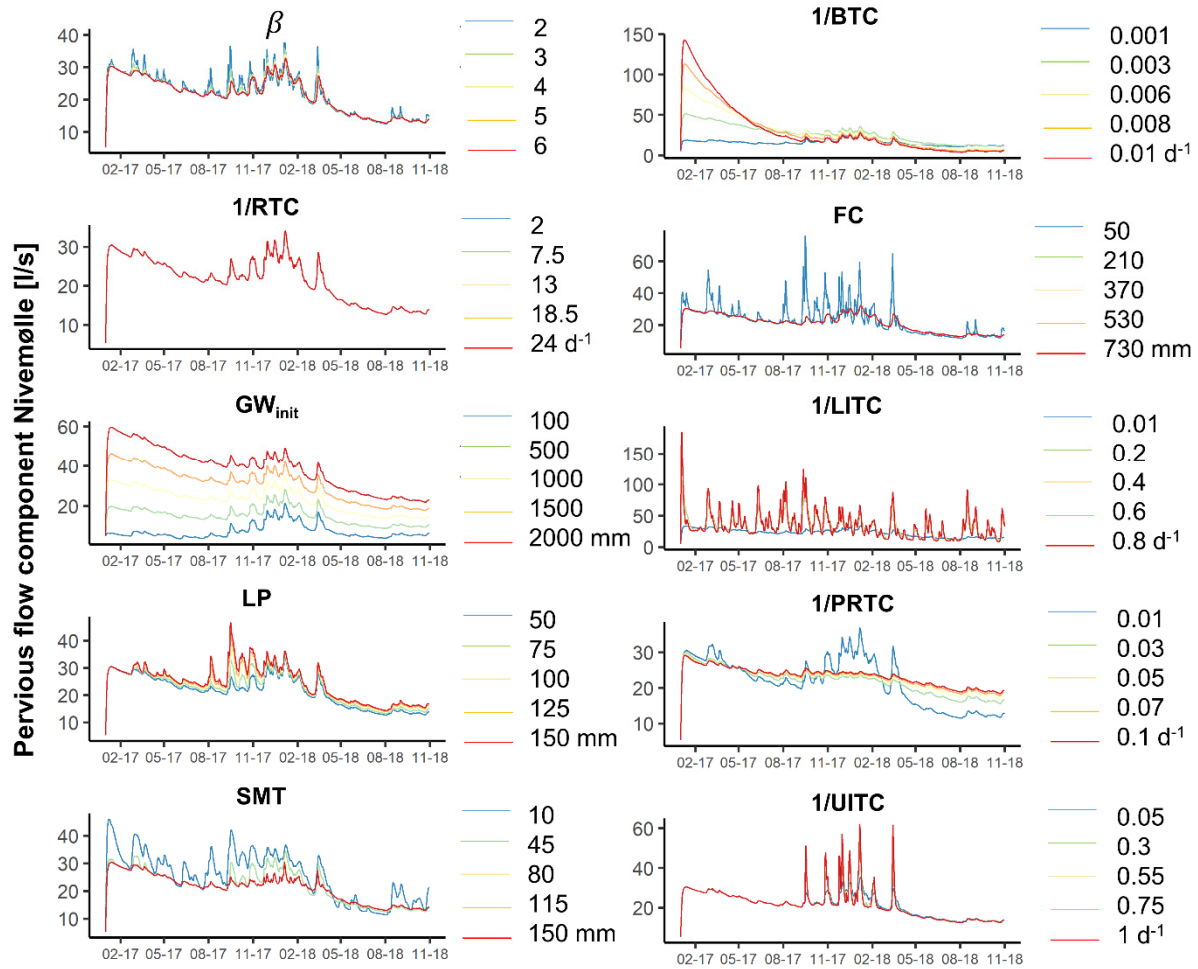

Figure S17. Rainfall-Runoff model sensitivity testing (Nivemølle station). Results are presented at a daily average time-step. Parameters range and references are given in the Table X1 below.

Table X1. Parameter ranges for the sensitivity test of the Rainfall-Runoff model

| Parameter | Unit              | Description                                              | Range        | Reference for range  |
|-----------|-------------------|----------------------------------------------------------|--------------|----------------------|
| FC        | mm                | Field capacity equivalent                                | [50–700]     | Beck et al. (2016)   |
| LP        | mm                | Soil moisture threshold for Potential Evapotranspiration | [50–150]*    | Beck et al. (2016)   |
| β         | -                 | Evapotranspiration reduction factor                      | [1–6]        | Beck et al. (2016)   |
| SMT       | mm                | Soil moisture threshold – upper interflow                | [10–150]*    | Beck et al. (2016)   |
| 1/RTC     | day <sup>-1</sup> | Runoff time constant                                     | [2–24]       | Estimate             |
| 1/UITC    | day <sup>-1</sup> | Upper interflow rate                                     | [0.05–1]     | Beck et al. (2016)   |
| 1/LITC    | day <sup>-1</sup> | Lower interflow time rate                                | [0.01–0.8]   | Beck et al. (2016)   |
| 1/PRTC    | day <sup>-1</sup> | Percolation rate                                         | [0,01–0,1]   | Beck et al. (2016)** |
| 1/BTC     | day <sup>-1</sup> | Baseflow rate                                            | [0.001–0.01] | Beck et al. (2016)   |
| GWinit    | mm                | Deep soil moisture initial value                         | [100–2000]   | Estimate             |

\*: upper limit bounded by the calibrated model parameters

\*\*.: to ensure percolation rate variation within range reported by (Beck et al., 2016)

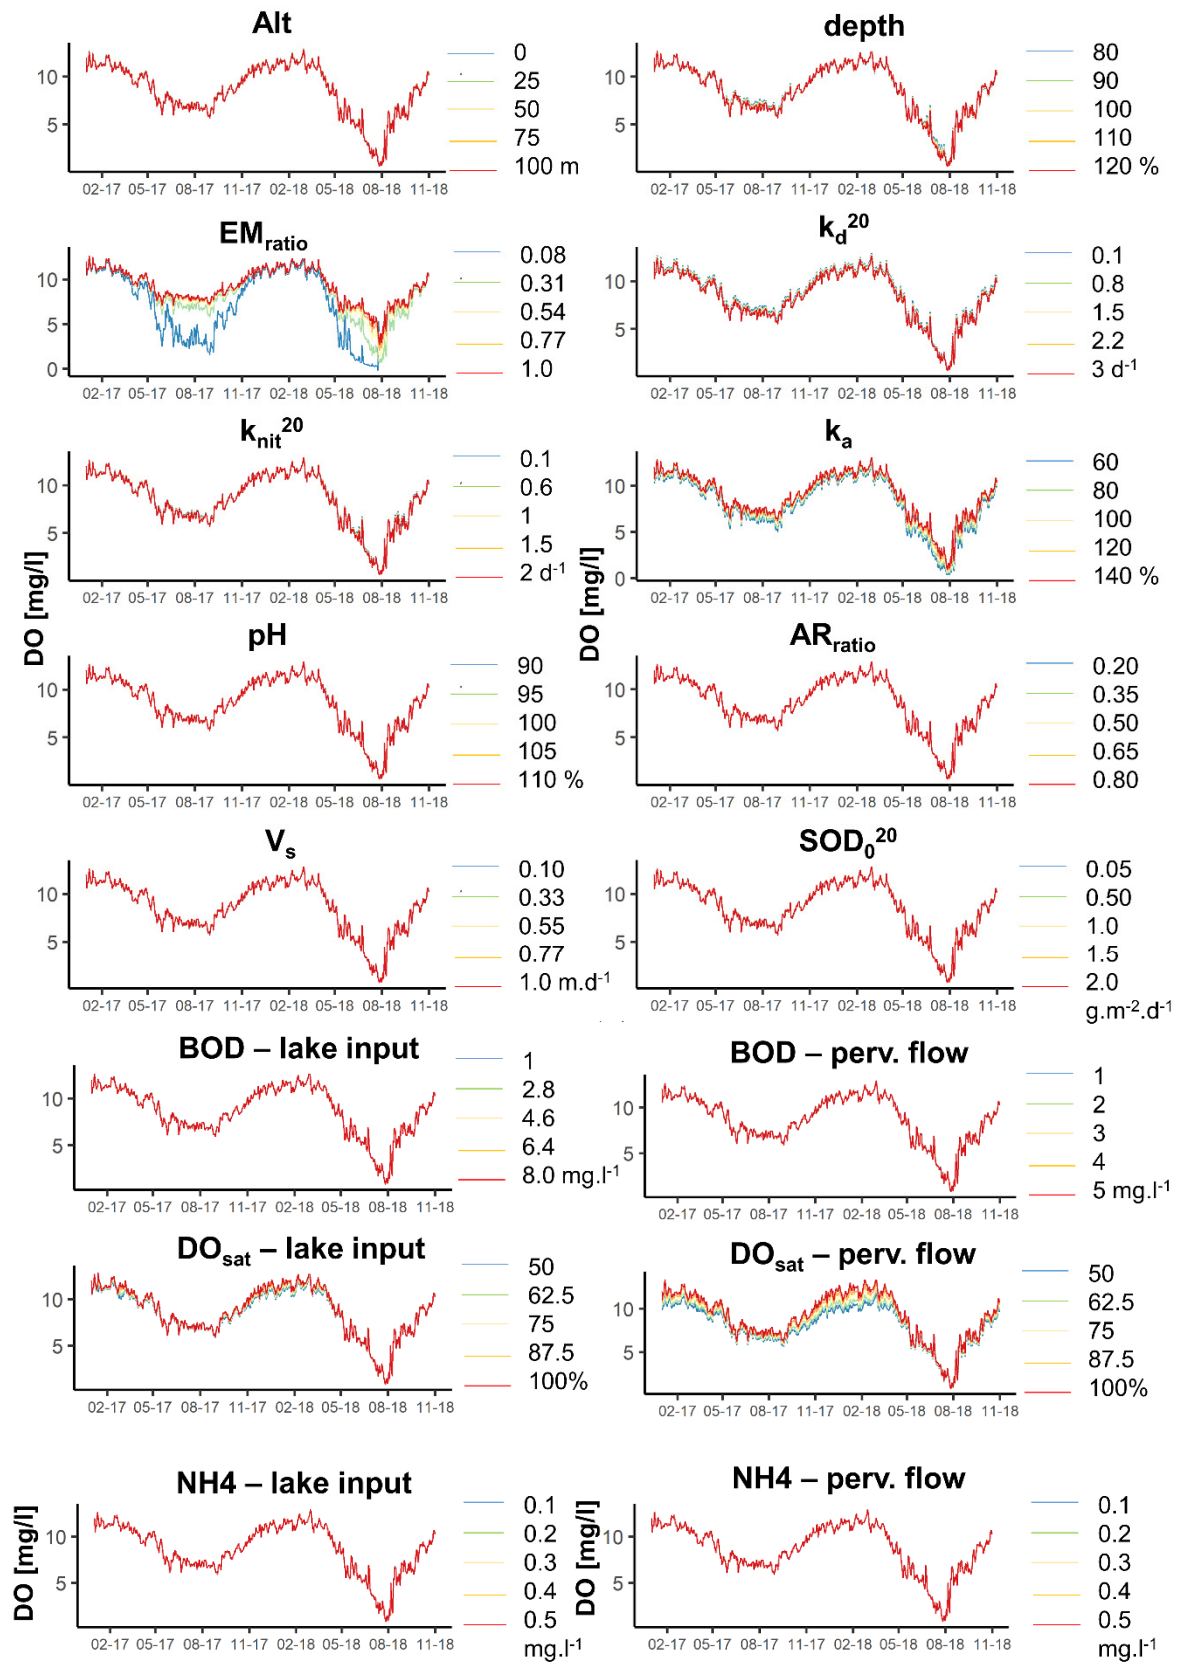

Figure S18. Sensitivity testing for the DO concentration simulation (Parallelsvej Station). Results are presented at a daily average time-step. Parameters range and references are given in the Table X2 below.

Table X2. Parameter ranges for the sensitivity test related to DO concentration simulations

| Parameter                       | Unit                                   | Description                                                    | Range      | Reference for range                                                     |
|---------------------------------|----------------------------------------|----------------------------------------------------------------|------------|-------------------------------------------------------------------------|
| Alt                             | m                                      | Field capacity equivalent                                      | [0–100]    | GIS data                                                                |
| depth                           | m                                      | Stream water depth                                             | [80–120%]* | Perturbation of calculation results                                     |
| EM <sub>ratio</sub>             | -                                      | Ecosystem metabolism ratio                                     | [0.01–1]   | Marcarelli et al. (2011)                                                |
| k <sub>d</sub> <sup>20</sup>    | day <sup>-1</sup>                      | Reference degradation rate constant for organic matter (20 °C) | [0.1–3]    | [10–90] percentile<br>Chapra (1997)                                     |
| k <sub>nit</sub> <sup>20</sup>  | day <sup>-1</sup>                      | Reference nitrification rate constant (20 °C)                  | [0.1–2]    | Chapra (1997)                                                           |
| k <sub>a</sub>                  | day <sup>-1</sup>                      | Reaeration rate constant                                       | [60–140%]  | Perturbation of calculation results, based on<br>Palumbo & Brown (2014) |
| pH                              | -                                      |                                                                | [90–110%]* | Perturbation of input data                                              |
| AR <sub>ratio</sub>             | -                                      | autotrophic respiration ratio                                  | [0.2–0.8]  | Hall & Beaulieu (2013)                                                  |
| V <sub>s,BOD</sub>              | m. day <sup>-1</sup>                   | Settling velocity, organic matter                              | [0.1–1]    | Chapra (1997)                                                           |
| SOD <sub>0</sub> <sup>20</sup>  | g. m <sup>-2</sup> . day <sup>-1</sup> | reference Sediment Oxygen Demand (20 °C)                       | [0.05–2]   | Chapra (1997)                                                           |
| BOD (Lake)                      | mg. l <sup>-1</sup>                    | cBOD from lake inflow                                          | [1–8]      | Lemaire (2021)                                                          |
| BOD (perv.inflow)               | mg. l <sup>-1</sup>                    | cBOD from pervious flow component                              | [1–5]      | Lemaire (2021)                                                          |
| DO <sub>sat</sub> (Lake)        | %                                      | Sat. level DO from lake                                        | [50–100]   | Lemaire (2021)                                                          |
| DO <sub>sat</sub> (perv.inflow) | %                                      | Sat. level DO from pervious component                          | [50–100]   | estimation                                                              |
| NH <sub>4</sub> (Lake)          | mg. l <sup>-1</sup>                    | Ammonium concentration from lake inflow                        | [0.1–0.5]  | Lemaire (2021)                                                          |
| NH <sub>4</sub> (perv. inflow)  | mg. l <sup>-1</sup>                    | Ammonium concentration from pervious component                 | [0.1–0.5]  | Lemaire (2021)                                                          |

\*: upper limit bounded by the calibrated model parameters.

Table S1. Summary of available input and monitoring data for the simulated peri-urban catchment. Detailed description and quantitative values can be found in SI (Fig. S2.4, and Table S3). By default, the 6 locations in this table refer to the 6 flow/depth monitoring stations (Sjælsø, Grønnegade, Ådalsevej, Parallelsvej, Nivemølle, Fredtoften, Brønsholmdalsvej ; Fig. 2). (\*): Grønnegade, Ådalsevej, Nivemølle station only. The location for pH, temperature and dissolved oxygen monitoring are shown in Fig. 2.

| Parameter                                                                                               | Sampling frequency          | Location<br>(Fig 2, S2)          | Source/References          |
|---------------------------------------------------------------------------------------------------------|-----------------------------|----------------------------------|----------------------------|
| Land use, elevation                                                                                     | /                           | Catchment                        | Danmark Miljøportal (2020) |
| Sewer network type<br>(extent, imperviousness)                                                          | /                           | Catchment                        | NOVAFOS (2020)             |
| Air Temperature                                                                                         | Daily                       | Catchment                        | Rudersdal et al. (2020)    |
| Precipitation                                                                                           | Hourly                      | Catchment                        | DMI (2020b)                |
| Cloud cover                                                                                             | Daily                       | Outside catchment                | DMI (2020a)                |
| Extraterrestrial Radiation                                                                              | Daily                       | Catchment                        | DMI (2020a)                |
| Flow                                                                                                    | Hourly                      | 6 locations                      | Rudersdal et al. (2020)    |
| Water depth                                                                                             | Hourly                      | 6 locations                      |                            |
| Water abstraction                                                                                       | Daily                       | 3 main areas                     |                            |
| Water temperature                                                                                       | Hourly /                    | 1 location                       | Rudersdal et al. (2020)    |
|                                                                                                         | Bi-monthly                  | 3 locations *                    | Lemaire (2021)             |
| pH                                                                                                      | Hourly /                    | 1 location                       | Rudersdal et al. (2020)    |
|                                                                                                         | Bi-monthly                  | 3 locations *                    | Lemaire (2021)             |
| Oxygen                                                                                                  | Hourly                      | 2 locations                      | Rudersdal et al. (2020)    |
|                                                                                                         | Bi-monthly                  | 3 locations *                    | Lemaire (2021)             |
| Nutrient (NH <sub>4</sub> <sup>+</sup> , NO <sub>3</sub> <sup>-</sup> , PO <sub>4</sub> <sup>3-</sup> ) | Bi-monthly                  | 3 locations *                    | Lemaire (2021)             |
| Chl-a                                                                                                   | Bi-monthly                  | 3 locations *                    | Lemaire (2021)             |
| CSO flow                                                                                                | Event                       | Ådalsevej<br>(multiple in reach) | Hørsholm Kommune (2020)    |
| Effluent flow                                                                                           | Daily                       | 3 WWTPs                          | NOVAFOS (2020)             |
| Effluent properties<br>(temperature, DO sat, Nutrient)                                                  | Variable<br>(daily-monthly) | 3 WWTPs                          | NOVAFOS (2020)             |

Table S2. Overview of the model input data for the Usserød catchment, data type (time series or constant value), associated time range, and source for the baseline simulation. Input data under “Outlet reach 1/Forcing reach 2” are used for the nutrient concentration simulations only (see section “calibration” in the associated manuscript).

| Parameter                             | Unit | Time variable (TV) / Constant (CSTE) | Value or time range | Reference                                      |
|---------------------------------------|------|--------------------------------------|---------------------|------------------------------------------------|
| <b>General input</b>                  |      |                                      |                     |                                                |
| Precipitation                         |      | Time series                          | 2017-2019, daily    | DMI, (2020b)                                   |
| Air temperature                       |      | Time series                          | 2017-2019, daily    | DMI (2020a)                                    |
| Extraterrestrial radiation            |      | Time series                          | Calculated          | Bojanowski (2013)                              |
| <b>Lake</b>                           |      |                                      |                     |                                                |
| Flow                                  |      | Time series                          | 2017-2019, daily    | Rudersdal et al. (2020)                        |
| DO sat                                |      | CSTE                                 | 0.7                 | Calibrated                                     |
| NH3-N                                 |      | CSTE                                 | 0.23                | Lemaire (2021)                                 |
| NO3-N                                 |      | CSTE                                 | 0.2                 | Lemaire (2021)                                 |
| BOD                                   |      | CSTE                                 | 4.5                 | Lemaire (2021)                                 |
| chl-a                                 |      | CSTE                                 | 0.03                | Lemaire (2021)                                 |
| PO4-P                                 |      | CSTE                                 | 0.12                | Lemaire (2021)                                 |
| Temperature                           |      | not available                        |                     |                                                |
| <b>Outlet reach 1/Forcing reach 2</b> |      |                                      |                     |                                                |
| Flow                                  |      | Time series                          | 2017-2019, daily    | Rudersdal et al. (2020)                        |
| DO sat                                |      | Time series                          | Nov 18-Oct 19*      | Lemaire (2021)                                 |
| NH3-N                                 |      | Time series                          | Nov 18-Oct 19*      | Lemaire (2021)                                 |
| NO3-N                                 |      | Time series                          | Nov 18-Oct 19*      | Lemaire (2021)                                 |
| BOD                                   |      | Time series                          | Nov 18-Oct 19*      | Lemaire (2021)                                 |
| chl-a                                 |      | Time series                          | Nov 18-Oct 19*      | Lemaire (2021)                                 |
| PO4-P                                 |      | Time series                          | Nov 18-Oct 19*      | Lemaire (2021)                                 |
| Temperature                           |      | Time series                          | 2017-2019, daily    | Rudersdal et al. (2020)                        |
| pH                                    |      | Time series                          | 2017-2019, daily    | Rudersdal et al. (2020)                        |
| <b>Flow component-pervious areas</b>  |      |                                      |                     |                                                |
| Flow                                  |      | Time series                          | Calculated          |                                                |
| DO sat                                |      | CSTE                                 | 0.7                 | Calibrated                                     |
| NH3-N                                 |      | CSTE                                 | 0.12                | Lemaire (2021)                                 |
| NO3-N                                 |      | CSTE                                 | 1.7                 | Lemaire (2021)                                 |
| BOD                                   |      | CSTE                                 | 2.7                 | Lemaire (2021)                                 |
| chl-a                                 |      | CSTE                                 | 0.004               | Lemaire (2021)                                 |
| PO4-P                                 |      | CSTE                                 | 0.07                | Lemaire (2021)                                 |
| Temperature                           |      | Time series                          | Calculated          | regression model, SI Fig S6                    |
| <b>Tributary</b>                      |      |                                      |                     |                                                |
| Flow                                  |      | Time series                          | Calculated          |                                                |
| DO sat                                |      | CSTE                                 | 0.7                 | Calibrated                                     |
| NH3-N                                 |      | CSTE                                 | 0.07                | Lemaire (2021)                                 |
| NO3-N                                 |      | CSTE                                 | 1.5                 | Lemaire (2021)                                 |
| BOD                                   |      | CSTE                                 | 2.7                 | Lemaire (2021)                                 |
| chl-a                                 |      | CSTE                                 | 0.004               | Lemaire (2021)                                 |
| PO4-P                                 |      | CSTE                                 | 0.04                | Lemaire (2021)                                 |
| Temperature                           |      | Time series                          | Calculated          | regression model, SI Fig S6                    |
| <b>Separated systems</b>              |      |                                      |                     |                                                |
| Flow                                  |      | Time series                          | Calculated          |                                                |
| DO sat                                |      | CSTE                                 | 0.7                 | Calibrated                                     |
| NH3-N                                 |      | CSTE                                 | 0.5                 | 25% total-N concentration<br>Danish EPA (2006) |
| NO3-N                                 |      | CSTE                                 | 0.5                 | 25% total-N concentration<br>Danish EPA (2006) |
| BOD                                   |      | CSTE                                 | 10                  | assumption                                     |
| chl-a                                 |      | CSTE                                 | 0                   | assumption                                     |
| PO4-P                                 |      | CSTE                                 | 0.25                | 50% total-P concentration<br>Danish EPA (2006) |
| Temperature                           |      | Time series                          | Calculated          | regression model, SI Fig S6                    |

**Combined Sewer Overflow**

|                                |             |                  |                                                                                   |
|--------------------------------|-------------|------------------|-----------------------------------------------------------------------------------|
| Flow                           | Time series | Calculated       |                                                                                   |
| DO sat                         | CSTE        | 0.7              | Calibrated                                                                        |
| NH3-N                          | CSTE        | 30               | mean from daily time serie<br>- inlet WWTP reach 2 (2019)<br>NOVAFOS (2020)       |
| NO3-N                          | CSTE        | 1                | mean from daily time serie -<br>inlet WWTP reach 2 (2019)<br>NOVAFOS (2020)       |
| BOD                            | CSTE        | 230              | mean from bi-monthly<br>sampling - inlet WWTP reach 2<br>(2019)<br>NOVAFOS (2020) |
| chl-a                          | CSTE        | 0                | assumption                                                                        |
| PO4-P                          | CSTE        | 4                | mean from daily time serie<br>- inlet WWTP reach 2 (2019)<br>NOVAFOS (2020)       |
| Temperature                    | Time series | Calculated       | regression model, Fig S6                                                          |
| <b>WWTP (reach Grønnegade)</b> |             |                  |                                                                                   |
| Flow                           | Time series | Calculated       |                                                                                   |
| DO sat                         | Time series | 2017-2019**      | NOVAFOS (2020)                                                                    |
| NH3-N                          | Time series | 2017-2019**      | NOVAFOS (2020)                                                                    |
| NO3-N                          | Time series | 2017-2019**      | NOVAFOS (2020)                                                                    |
| BOD                            | Time series | 3.1              | mean monthly sampling (2019)<br>NOVAFOS (2020)                                    |
| chl-a                          | CSTE        | 0                | Assumption                                                                        |
| PO4-P                          | Time series | Time serie       | 50% total-P concentration<br>NOVAFOS (2020)                                       |
| <b>WWTP (reach Ådalsvej)</b>   |             |                  |                                                                                   |
| Flow                           | Time series | 2017-2019, daily | NOVAFOS (2020)                                                                    |
| DO sat                         | Time series | 2017-2019, daily | NOVAFOS (2020)                                                                    |
| NH3-N                          | Time series | 2017-2019, daily | NOVAFOS (2020)                                                                    |
| NO3-N                          | Time series | 2017-2019, daily | NOVAFOS (2020)                                                                    |
| BOD                            | CSTE        | /                | mean bi-monthly sampling<br>(2019)<br>NOVAFOS (2020)                              |
| chl-a                          | 0           | /                | Assumption                                                                        |
| PO4-P                          | Time series | 2017-2019, daily | NOVAFOS (2020)                                                                    |
| Temperature                    | Time series | 2017-2019, daily | NOVAFOS (2020)                                                                    |

\*: Measurement frequency ca. every 6 weeks (n= 10)

\*\*: Uneven measurement frequency ca. every 3 to 5 days



Table S3. Model performance rating for Nash-Sutcliffe Efficiency (NSE), Percent BIAS (PBIAS) and RMSE-observations standard deviation ratio (RSR) according to (Pérez-Sánchez et al., 2017).

| Performance    | NSE         | RSR       | PBIAS            |
|----------------|-------------|-----------|------------------|
| Very good      | [0.75-1]    | [0-0.5]   | <+/- 10          |
| Good           | [0.65-0.75] | [0.5-0.6] | [+/- 10 - +/-15] |
| Satisfactory   | [0.5-0.65]  | [0.6-0.7] | [+/- 15 - +/-25] |
| Unsatisfactory | <0.5        | >0.70     | >+/- 25          |

Where:

$$\begin{aligned}
 NSE &= 1 - \frac{\sum_{t=1}^n (Y_{sim,t} - Y_{meas,t})^2}{\sum_{t=1}^n (Y_{sim,t} - \bar{Y}_{meas})^2} \\
 PBIAS &= 100 \times \frac{\sum_{t=1}^n (Y_{meas,t} - Y_{sim,t})}{\sum_{t=1}^n Y_{meas,t}} \\
 RMSE &= \sqrt{\frac{\sum_{t=1}^n (Y_{meas,t} - Y_{sim,t})^2}{n}} \\
 RSR &= \frac{RMSE}{STDEV_{obs}} = \sqrt{\frac{\sum_{t=1}^n (Y_{meas,t} - Y_{sim,t})^2}{\sum_{t=1}^n (Y_{meas,t} - \bar{Y}_{meas,t})^2}} \\
 R^2 &= 1 - \frac{\sum_{t=1}^n (Y_{meas,t} - \hat{Y}_t)^2}{\sum_{t=1}^n (Y_{meas,t} - \bar{Y}_{meas})^2}
 \end{aligned}$$

Table S4. Model parameters, all reaches (A: Grønnegade, B: Ådalsvej, C: Parallelsvej, D: Nivemølle, E: Fredtoften, F: Brønsholmdalsvej (compare Fig. 2). If not explicitly given, the parameter value is uniform across all reaches and “/” indicates this parameter is not relevant in a given reach. Parameter descriptions are given in Appendix A.

| Parameter                                           | A    | B     | C     | D     | E    | F    | Reference                       |
|-----------------------------------------------------|------|-------|-------|-------|------|------|---------------------------------|
| <b>Catchment and reach characteristics</b>          |      |       |       |       |      |      |                                 |
| Alt [m]                                             |      |       |       |       |      |      | 8, from DSFE (2020)             |
| A [ $km^2$ ]                                        | 2.08 | 11.65 | 1.30  | 3.90  | 15.5 | 18.5 | DSFE (2020)                     |
| L [m]                                               | 1600 | 3000  | 1900  | 3550  | 4200 | 6100 | DSFE (2020)                     |
| b [m]                                               | 3    | 2.75  | 3.25  | 3.25  | 1.25 | 1.25 | DSFE (2020)                     |
| s [‰]                                               | 1.1  | 3.0   | 1.5   | 1.5   | 1.5  | 1.5  | Rudersdal (2018)                |
| $f_{imp}$ [-]                                       | 0.03 | 0.2   | 0.25  | 0.28  | 0    | 0.05 | NOVAFOS (2020)                  |
| $f_{cs}$ [-]                                        | 0.5  | 0.65  | 0.5   | 0.1   | -    | 0    | NOVAFOS (2020)                  |
| $f_{ss}$ [-]                                        | 0.5  | 0.35  | 0.5   | 0.9   | -    | 1    | NOVAFOS (2020)                  |
| <b>Hydrological model parameters</b>                |      |       |       |       |      |      |                                 |
| FC [mm]                                             |      |       |       |       |      |      | 140 (Calibrated)                |
| LP [mm]                                             |      |       |       |       |      |      | 50 (Calibrated)                 |
| $\beta$ [-]                                         |      |       |       |       |      |      | 4 (Calibrated)                  |
| SMT [mm]                                            |      |       |       |       |      |      | 55 (Calibrated)                 |
| RTC [day]                                           |      |       |       |       |      |      | 0.125 (Calibrated)              |
| UITC [day]                                          |      |       |       |       |      |      | 0.035 (Calibrated)              |
| LITC [day]                                          |      |       |       |       |      |      | 0.005 (Calibrated)              |
| PRTC [day]                                          |      |       |       |       |      |      | 0.009 (Calibrated)              |
| DSMT [day]                                          |      |       |       |       |      |      | 0.002 (Calibrated)              |
| SDR [day]                                           |      |       |       |       |      |      | 0.5 (Calibrated)                |
| GW [mm]<br>( $t=0$ )                                | 2000 | 100   | 1000  | 1000  | 0    | 2000 | (Calibrated)                    |
| Contrib <sub>GWAR</sub> [-]                         |      |       |       |       |      |      | 0.01 (assumption)               |
| GSI [-]                                             | 0    | 0     | -3e-4 | -3e-4 | 0    | 0    | Calibrated                      |
| SSTC [day]                                          | /    | 0.05  | /     | /     | /    | /    | Calibrated                      |
| CSTC [day]                                          | /    | 0.5   | /     | /     | /    | /    | Calibrated                      |
| CSOTC [day]                                         | /    | 0.95  | /     | /     | /    | /    | Calibrated                      |
| $\overline{Q}_{dry}$ [ $m^3 \cdot day^{-1}$ ]       | /    | 5700  | /     | /     | /    | /    | Calibrated                      |
| $Q_{MAX}$ [ $m^3 \cdot day^{-1}$ ]                  | /    | 50000 | /     | /     | /    | /    | Calibrated                      |
| $V_{threshold}$ [ $m^3$ ]                           | /    | 10000 | /     | /     | /    | /    | Calibrated                      |
| <b>Temperature</b>                                  |      |       |       |       |      |      |                                 |
| P [ $kg / m^3$ ]                                    |      |       |       |       |      |      | 1000                            |
| Cp [ $kg / m^3$ ]                                   |      |       |       |       |      |      | 4182                            |
| K [ $J / (m^2 \cdot ^\circ C \cdot kg \cdot day)$ ] |      |       |       |       |      |      | 1.9e6 Bogan et al. (2003)       |
| <b>Oxygen and nutrients</b>                         |      |       |       |       |      |      |                                 |
| $\theta_a$ [-]                                      |      |       |       |       |      |      | 1.024, from Chapra (1997)       |
| $k_d^{20}$ [ $day^{-1}$ ]                           |      |       |       |       |      |      | 0.5, from Chapra (1997)         |
| $\theta_{BOD}$ [-]                                  |      |       |       |       |      |      | 1.047, from Bowie et al. (1985) |
| $V_{s,BOD}$ [ $m \cdot day^{-1}$ ]                  |      |       |       |       |      |      | 0.1, from Chapra (1997)         |
| $r_{on}$ [ $g \cdot gN^{-1}$ ]                      |      |       |       |       |      |      | 4.57, from Chapra (1997)        |
| $k_{nit}^{20}$ [ $day^{-1}$ ]                       |      |       |       |       |      |      | 0.3, from Bowie et al. (1985)   |
| $\theta_{nit}$ [-]                                  |      |       |       |       |      |      | 1.085, from Bowie et al. (1985) |
| $k_{denit}^{20}$ [ $day^{-1}$ ]                     |      |       |       |       |      |      | 0.1, from Bowie et al. (1985)   |
| $\theta_{denit}$ [-]                                |      |       |       |       |      |      | 1.045, from Bowie et al. (1985) |
| $k_{s,denit\_lim}$ [ $mg \cdot l^{-1}$ ]            |      |       |       |       |      |      | 0.1, from Bowie et al. (1985)   |
| $SOD_o^{20}$ [ $g \cdot m^{-2} \cdot day^{-1}$ ]    |      |       |       |       |      |      | 1, from Bowie et al. (1985)     |
| $\theta_{SOD}$ [-]                                  |      |       |       |       |      |      | 1.065, from Bowie et al. (1985) |
| $k_{s,o\_lim}$ [ $mg \cdot l^{-1}$ ]                |      |       |       |       |      |      | 1.4, from Bowie et al. (1985)   |
| <b>Freshwater plant and algae biomass</b>           |      |       |       |       |      |      |                                 |
| $V_{set,sus}$ [ $m \cdot day^{-1}$ ]                |      |       |       |       |      |      | 0.1, from Bowie et al. (1985)   |
| $G_{max,sus}$ [ $day^{-1}$ ]                        |      |       |       |       |      |      | 2, from Bowie et al. (1985)     |

|                                                   |                                           |
|---------------------------------------------------|-------------------------------------------|
| $G_{max,mac}[day^{-1}]$                           | 0.1, from<br>Nielsen & Sand-Jensen (1991) |
| $k_{s,P\_lim}[mgP.l^{-1}]$                        | 0.025, from Bowie et al. (1985)           |
| $k_{s,N\_lim}[mgN.l^{-1}]$                        | 0.0005, from Bowie et al. (1985)          |
| $\gamma_{l,background}[m^{-1}]$                   | 0.5, from Julian et al. (2008)            |
| $\gamma_{l,bio\_sus}$<br>$[m^{-1}.l.mgchla^{-1}]$ | 0.035, from Chapra (1997)                 |
| $I_{opt}[ly.day^{-1}]$                            | 200, from Bowie et al. (1985)             |
| $\Phi_{atm}[-]$                                   | 0.38, from Wild et al. (2019)             |
| $\Phi_{PAR}[-]$                                   | 0.47, from Carr et al. (1997)             |
| $\Phi_{reflec}[-]$                                | 0.1, from Julian et al. (2008)            |
| $r_{oa}[mg.\mu gChla^{-1}]$                       | 1.5 (calibrated)                          |
| $AR_{ratio}[-]$                                   | 0.45, from<br>Hall & Beaulieu (2013)      |
| $EM_{ratio}[-]$                                   | 0.26 (Calibrated)                         |

---

Table S5. Parameter probability distributions used for the MC simulation for dissolved oxygen concentration shown in Fig. 6.

| State variable | Parameter                                 | Value or time range                                                     | Source                             |
|----------------|-------------------------------------------|-------------------------------------------------------------------------|------------------------------------|
| <b>DO</b>      |                                           |                                                                         |                                    |
|                | Saturation DO init. lake inflow           | $[DO_{sat}] \sim U[50,100] \%$                                          | Lemaire (2021)                     |
|                | Saturation DO init. – nat. flow component | $[DO_{sat}] \sim U[60,100] \%$                                          | Estimate                           |
|                | Saturation DO init. - separated systems   | $[DO_{sat}] \sim U[60,100] \%$                                          | Estimate                           |
|                | Saturation DO init. - CSOs                | $[DO_{sat}] \sim U[30,100] \%$                                          | Estimate                           |
|                | Reach $DO_{sat}$ estimate                 | Perturbation calculated value<br>$U[-10,+10]\%$                         | Estimate                           |
|                | Reaeration rate                           | Perturbation calculated value<br>$k_a \cdot U[-40,+40]\%$               | Palumbo & Brown (2014)             |
|                | Ecosystem metabolism ratio                | $EM_{ratio} \sim U[0.01-1]$                                             | Marcarelli et al. (2011)           |
|                | Autotrophic respiration ratio             | $AR_{ratio} \sim U[0.3,0.7]$                                            | Estimate                           |
|                | BOD concentration (WWTP reach C)          | $BOD \sim \log N[2.5,5] \text{ mg.l}^{-1}$                              | (NOVAFOS (2020)                    |
|                | BOD degradation rate                      | $k_d \sim U[0.1,0.3] \text{ day}^{-1}$                                  | Chapra (1997)                      |
|                | SOD background                            | $SOD_{BG} \sim U[0.1,2] \text{ g.m}^2.\text{day}^{-1}$                  | Chapra (1997)                      |
|                | Optimal growth macrophyte                 | $G_{max} \sim U[0.01,0.2] \text{ day}^{-1}$                             | (Nielsen & Sand-Jensen, 1991)      |
|                | Optimal light level                       | $I_{opt} \sim U[100,300] \text{ ly.day}^{-1}$                           | Bowie et al. (1985)                |
|                | Nitrification rate                        | $k_{nit}^{20} \sim U[0.2, 6] \text{ day}^{-1}$                          | Bowie et al. (1985)                |
|                | Attenuation cloud cover                   | Perturbation calculated value<br>$\emptyset_{cloud} \cdot U[-40,+40]\%$ | Estimate                           |
|                | Oxygen yield per unit biomass             | $r_{oa} \sim U[0.5,2.5] \text{ mg.}\mu\text{gChla}^{-1}$                | Krause-Jensen & Sand-Jensen (1998) |

Table S6. Parameter probability distributions used for setting up the MC simulation regarding physico-chemical conditions and shown in Fig. 7.

| State variable                               | Parameter                             | Distribution                                                       | Reference             |
|----------------------------------------------|---------------------------------------|--------------------------------------------------------------------|-----------------------|
| <b>Stream temperature</b>                    |                                       |                                                                    |                       |
|                                              | Natural flow component temperature    | Perturbation regression baseline parameters: $U[-10,+10]\%$        | Estimate, Fig S6.     |
|                                              | Equilibrium temperature               | Perturbation regression baseline parameters: $U[-10,+10]\%$        | Estimate, Appendix A  |
|                                              | Coefficient heat transfer             | $K \sim U[1.9e6, 2.4e6]$                                           | Bogan et al. (2003)   |
| <b>Inorganic nitrogen (NH4-N, NO3-N)</b>     |                                       |                                                                    |                       |
|                                              | NH4 concentration nat. flow component | $[NH_4-N] \sim N[0.12, 0.13] \text{ mg-N/l}$                       | Thodsen et al. (2016) |
|                                              | NO3 concentration nat. flow component | $[NO_3-N] \sim N[3.16, 2.07] \text{ mg-N/l}$                       | Thodsen et al. (2016) |
|                                              | NH4 concentration - Separated systems | Perturbation baseline value $U[-50,+50]\%$                         | Estimate, Table S1    |
|                                              | NO3 concentration - Separated systems | Perturbation baseline value $U[-50,+50]\%$                         | Estimate, Table S1    |
|                                              | NH4 concentration - CSOs              | Perturbation baseline value $U[-50,+50]\%$                         | Estimate, Table S1    |
|                                              | NO3 concentration -CSOs               | Perturbation baseline value $U[-50,+50]\%$                         | Estimate, Table S1    |
|                                              | Nitrification rate                    | $k_{nit}^{20} \sim U[0.2, 6] \text{ day}^{-1}$                     | Bowie et al. (1985)   |
|                                              | Denitrification rate $k_{denit}$      | $k_{denit}^{20} \sim U[0.1, 1] \text{ day}^{-1}$                   | Bowie et al. (1985)   |
| <b>Dissolved reactive Phosphorus (PO4-P)</b> |                                       |                                                                    |                       |
|                                              | PO4 concentration nat. flow component | $[PO_4-P] \sim N[0.06, 0.07] \text{ mg-P/l}$                       | Thodsen et al. (2016) |
|                                              | PO4 concentration -Tributary          | Perturbation baseline value $U[-50,+50]\%$                         | Estimate, Table S1    |
|                                              | PO4 concentration -Separated systems  | Perturbation baseline value $U[-50,+50]\%$                         | Estimate, Table S1    |
|                                              | PO4 concentration - CSOs              | Perturbation baseline value $U[-50,+50]\%$                         | Estimate, Table S1    |
|                                              | PO4 concentration - WWTP              | Perturbation baseline value $U[-50,+50]\%$                         | Estimate, Table S1    |
| <b>Suspended chl-a</b>                       |                                       |                                                                    |                       |
|                                              | Optimum growth rate                   | $G_{max,sus} \sim U[0.2-3] \text{ day}^{-1}$                       | Bowie et al. (1985)   |
|                                              | Maintenance/respiration/loss rate     | $k_r^{20} \sim U[-50,+50]\%$ . $G_{max,sus}$                       | Bowie et al. (1985)   |
|                                              | Temperature optimal growth            | $T_{opt} \sim U[15 - 30]^\circ C$                                  | Bowie et al. (1985)   |
|                                              | Light Attenuation coefficient biomass | Perturbation default value $\gamma_{l,bio,sus} \cdot U[-30,+30]\%$ | Estimate, Appendix A  |
|                                              | Settling velocity                     | $V_{set,sus} \sim U[0.01 - 1] m. day^{-1}$                         | Chapra (1997)         |

## REFERENCES

- Beck, H. E., van Dijk, A. I. J. M., de Roo, A., Miralles, D. G., McVicar, T. R., Schellekens, J., & Bruijnzeel, L. A. (2016). Global-scale regionalization of hydrologic model parameters. *Water Resources Research*, 52(5).
- Bogan, T., Mohseni, O., & Stefan, H. G. (2003). Stream temperature-equilibrium temperature relationship. *Water Resources Research*, 39(9), 1–12.
- Bojanowski, J. S. (2013). sirad: Functions for calculating daily solar radiation and evapotranspiration. *R Package Version 2.0-7*, 1–35. Retrieved from <http://cran.r-project.org/package=sirad>
- Bowie, G., Mills, W., Porcella, D., Campbell, C., Pagenkopf, J., Rupp, G., et al. (1985). *Rates, constants, and kinetic formulations in surface water modeling*. (US EPA, Athens, Georgia, US).
- Carr, G. M., Duthie, H. C., & Taylor, W. D. (1997). Models of aquatic plant productivity: A review of the factors that influence growth. *Aquatic Botany*, 59(3–4), 195–215.
- Chapra, S. C. (1997). *Surface Water-Quality Modeling* (Waveland P).
- Danish EPA. (2006). (in Danish) Målinger af forureningsindhold i regnbetingede udledninger. report n.10.
- Danmark Miljøportal. (2020). (in Danish) Environmental database. Retrieved February 1, 2020, from <http://arealinformation.miljoportal.dk/html5/index.html?viewer=distribution>
- DMI. (2020a). DMI open data - meteorological observation. Retrieved October 15, 2020, from <http://confluence.govcloud.dk/display/FDAPI/Meteorological+Observation>
- DMI. (2020b). SVK bestilling - Rain monitoring stations. Retrieved January 1, 2018, from [http://svk.dmi.dk/dmi/RainEvents/\\*login](http://svk.dmi.dk/dmi/RainEvents/*login)
- DSFE. (2020). Danish Ministry Data Supply and Efficiency. Map service (Kortforsyningen) [WWW Document]. Retrieved February 10, 2020, from <http://kortforsyningen.dk/>
- Hall, R. O., & Beaulieu, J. J. (2013). Estimating autotrophic respiration in streams using daily metabolism data. *Freshwater Science*, 32(2), 507–516.
- Hørsholm Kommune. (n.d.). Hørsholm vand. Nedbør og overløb til Usserød å [in Danish]. Retrieved June 1, 2020, from <http://hydroinform.dk/HorsholmVandAa.html>
- Julian, J. P., Doyle, M. W., & Stanley, E. H. (2008). Empirical modeling of light availability in rivers. *Journal of Geophysical Research: Biogeosciences*, 113(3).
- Krause-Jensen, D., & Sand-Jensen, K. (1998). Light attenuation and photosynthesis of aquatic plant communities. *Limnology and Oceanography*, 43(3), 396–407.
- Lemaire, G. G. (2021). *Assessing the spatio-temporal dynamics and environmental impacts in peri-urban stream systems*. PhD thesis. Technical University of Denmark.
- Marcarelli, A. M., Baxter, C. V., Mineau, M. M., & Hall, R. O. (2011). Quantity and quality: Unifying food web and ecosystem perspectives on the role of resource subsidies in freshwaters. *Ecology*, 92(6), 1215–1225.
- Nielsen, S. L., & Sand-Jensen, K. (1991). Variation in growth rates of submerged rooted macrophytes. *Aquatic Botany*, 39(1–2), 109–120.
- NOVAFOS. (2020). Survey of public perception and Activities in Usserød å. technical meeting and data transfer, Hørsholm, Denmark.
- Palumbo, J. E., & Brown, L. C. (2014). Assessing the Performance of Reaeration Prediction Equations. *Journal of Environmental Engineering*, 140(3), 04013013.
- Pérez-Sánchez, M., Sánchez-Romero, F. J., Ramos, H. M., & López-Jiménez, P. A. (2017). Calibrating a flow model in an irrigation network : Case study in Alicante , Spain. *Spanish Journal of Agricultural Research*, 15(1).

- Rudersdal, Hørsholm, & Fredensborg. (2020). hydroinform. Retrieved from <http://hydroinform.dk/UsseroedIntern.html>
- Rudersdal, H. og F. K. (2018). Regulativ for Usserød. Technical report.
- Thodsen, H., Windolf, J., Rasmussen, J., Bøgestrand, J., Larsen, S. E., Tornbjerg, H., et al. (2016). (In Danish). *Vandløb 2015. NOVANA*. Aarhus Universitet, DCE – Nationalt Center for Miljø og Energi. Retrieved from <http://dce2.au.dk/pub/SR206.pdf>
- Wild, M., Hakuba, M. Z., Folini, D., Dörig-Ott, P., Schär, C., Kato, S., & Long, C. N. (2019). The cloud-free global energy balance and inferred cloud radiative effects: an assessment based on direct observations and climate models. *Climate Dynamics*, 52(7–8), 4787–4812.
